# Supplementary material for: Suicide-Related Events in Patients Treated with Antiepileptic Drugs
Source: Atypon-hosted journal article supplement (doi:10.1056/nejmoa0909801), 2010-08-04
Supplement: nejmoa0909801_appendix.pdf [file nejmoa0909801_appendix.pdf]

## Supplementary Appendix

This appendix has been provided by the authors to give readers additional information about their work.

Supplement to: Arana A, Wentworth CE, Ayuso-Mateos JL, Arellano FM. Suicide-related events in patients treated with antiepileptic drugs. *N Engl J Med* 2010;363:542-51.

# SUICIDALITY QUESTIONNAIRE

| Practice ID | Patient ID | Sex | Year of Birth | Date of Death |
|-------------|------------|-----|---------------|---------------|
|             |            |     |               |               |

Please answer all the questions according to the information held in the patient's written records by ticking the appropriate box or writing in the space provided.

This form was completed: using written records  from memory  (please tick)

1. Did the patient have an episode of suicidality (defined as suicidal thoughts, actions or attempts)?

- Yes
- No
- Unknown

2. Has the patient died, and if so, what was the cause of death?

- Patient is still alive
- Patient died – verdict suicide
- Patient died – verdict not known
- OTHER cause – please state cause if known

---

---

---

For patients who have died, please complete the Patient Detail Form so we may obtain a copy of Death Certificate.

Researcher's Ref -

**Online Table 1: Demographics and risk factors for patients with epilepsy, depression and BD stratified by AED use\***

| Risk factors                       | Depression only |        | Depression and AED use |        | BD only |        | BD and AED use |        |
|------------------------------------|-----------------|--------|------------------------|--------|---------|--------|----------------|--------|
|                                    | N Pts           | %      | N Pts                  | %      | N Pts   | %      | N Pts          | %      |
| Total                              | 435,790         | 100    | 30,772                 | 100    | 3,814   | 100    | 1,809          | 100    |
| Males                              | 139,921         | 32.1   | 9,888                  | 32.1   | 1,598   | 41.9   | 679            | 37.5   |
| Age in years                       |                 |        |                        |        |         |        |                |        |
| <20                                | 16,794          | 3.9    | 186                    | 0.6    | 37      | 1.0    | 10             | 0.6    |
| 20-34                              | 128,855         | 29.6   | 3,683                  | 12.0   | 705     | 18.5   | 323            | 17.9   |
| 35-64                              | 213,698         | 49.0   | 17,435                 | 56.7   | 2,041   | 53.5   | 1,080          | 59.7   |
| 65+                                | 70,489          | 16.2   | 9,376                  | 30.5   | 1,014   | 26.6   | 394            | 21.8   |
| Missing                            | 5,954           | 1.4    | 92                     | 0.3    | 17      | 0.4    | 2              | 0.1    |
| Mean (SD)                          | 44.6            | (18.1) | 54.7                   | (17.2) | 51.7    | (17.9) | 50.2           | (16.2) |
| Mean length of study in years (SD) | 5.9             | (4.8)  | 4.3                    | (4.0)  | 5.9     | (5.0)  | 5.2            | (4.2)  |
| Antipsychotic use in prior year    | 27,907          | 6.4    | 5,839                  | 19.0   | 1,379   | 36.2   | 1,046          | 57.8   |
| Antidepressant use in prior year   | 148,814         | 34.1   | 19,704                 | 64.0   | 1,343   | 35.2   | 943            | 52.1   |
| Lithium use in prior year          | 1,558           | 0.4    | 737                    | 2.4    | 1,266   | 33.2   | 712            | 39.4   |
| Drug abuse ever in past            | 727             | 0.2    | 102                    | 0.3    | 17      | 0.4    | 10             | 0.6    |

**Online Table 1: Demographics and risk factors for patients with epilepsy, depression and BD stratified by AED use\***

| Risk factors                         | Depression only |        | Depression and AED use |        | BD only |        | BD and AED use |        |
|--------------------------------------|-----------------|--------|------------------------|--------|---------|--------|----------------|--------|
|                                      | N Pts           | %      | N Pts                  | %      | N Pts   | %      | N Pts          | %      |
| Diagnosed mental disorder ever prior | 250,800         | 57.6   | 25,983                 | 84.4   | 2,793   | 73.2   | 1,595          | 88.2   |
| Alcohol abuse ever                   | 15,876          | 3.6    | 2,055                  | 6.7    | 222     | 5.8    | 144            | 8.0    |
| Chronic disease score                |                 |        |                        |        |         |        |                |        |
| Mean (SD)                            | 1.18            | (1.48) | 3.43                   | (2.05) | 1.07    | (1.36) | 2.58           | (1.66) |
| Score = 0                            | 202,776         | 46.5   | 1,109                  | 3.6    | 1,804   | 47.3   | 62             | 3.4    |
| 1                                    | 87,515          | 20.1   | 4,941                  | 16.1   | 873     | 22.9   | 480            | 26.5   |
| 2                                    | 70,943          | 16.3   | 5,009                  | 16.3   | 599     | 15.7   | 502            | 27.8   |
| 3                                    | 38,644          | 8.9    | 5,923                  | 19.2   | 303     | 7.9    | 306            | 16.9   |
| 4                                    | 20,157          | 4.6    | 5,299                  | 17.2   | 137     | 3.6    | 212            | 11.7   |
| ≥5                                   | 15,755          | 3.6    | 8,491                  | 27.6   | 98      | 2.6    | 247            | 13.7   |

\* AED = antiepileptic drug; BD = bipolar affective disorder; SD = standard deviation

**Online Table 1: Demographics and risk factors for patients with epilepsy, depression and BD stratified by AED use\***

| Risk factors                       | Epilepsy and Depression |        | Epilepsy, Depression and AED use |        | Epilepsy and BD |        | Epilepsy, BD and AED use |        |
|------------------------------------|-------------------------|--------|----------------------------------|--------|-----------------|--------|--------------------------|--------|
|                                    | N Pts                   | %      | N Pts                            | %      | N Pts           | %      | N Pts                    | %      |
| Total                              | 3,391                   | 100    | 7,870                            | 100    | 47              | 100    | 171                      | 100    |
| Males                              | 1,223                   | 36.1   | 3,056                            | 38.8   | 22              | 46.8   | 77                       | 45.0   |
| Age in years                       |                         |        |                                  |        |                 |        |                          |        |
| <20                                | 119                     | 3.5    | 192                              | 2.4    | 0               | 0.0    | 2                        | 1.2    |
| 20-34                              | 1,031                   | 30.4   | 1,720                            | 21.9   | 7               | 14.9   | 37                       | 21.6   |
| 35-64                              | 1,757                   | 51.8   | 4,109                            | 52.2   | 25              | 53.2   | 88                       | 51.5   |
| 65+                                | 438                     | 12.9   | 1,768                            | 22.5   | 15              | 31.9   | 44                       | 25.7   |
| Missing                            | 46                      | 1.4    | 81                               | 1.0    | 0               | 0.0    | 0                        | 0.0    |
| Mean (SD)                          | 43.4                    | (17.0) | 48.9                             | (18.4) | 54.4            | (17.6) | 50.3                     | (17.3) |
| Mean length of study in years (SD) | 4.9                     | (4.5)  | 5.0                              | (4.3)  | 4.5             | (4.2)  | 4.8                      | (3.9)  |
| Antipsychotic use in prior year    | 325                     | 9.6    | 1,200                            | 15.2   | 20              | 42.6   | 109                      | 63.7   |
| Antidepressant use in prior year   | 1,318                   | 38.9   | 3,551                            | 45.1   | 24              | 51.1   | 79                       | 46.2   |
| Lithium use in prior year          | 12                      | 0.4    | 58                               | 0.7    | 9               | 19.1   | 57                       | 33.3   |
| Drug abuse ever in past            | 4                       | 0.1    | 23                               | 0.3    | 1               | 2.1    | 0                        | 0.0    |

**Online Table 1: Demographics and risk factors for patients with epilepsy, depression and BD stratified by AED use\***

| Risk factors                         | Epilepsy and Depression |        | Epilepsy, Depression and AED use |        | Epilepsy and BD |        | Epilepsy, BD and AED use |        |
|--------------------------------------|-------------------------|--------|----------------------------------|--------|-----------------|--------|--------------------------|--------|
|                                      | N Pts                   | %      | N Pts                            | %      | N Pts           | %      | N Pts                    | %      |
| Diagnosed mental disorder ever prior | 968                     | 28.5   | 5,852                            | 74.4   | 41              | 87.2   | 131                      | 76.6   |
| Alcohol abuse ever                   | 400                     | 11.8   | 823                              | 10.5   | 7               | 14.9   | 25                       | 14.6   |
| Chronic disease score                |                         |        |                                  |        |                 |        |                          |        |
| Mean (SD)                            | 1.32                    | (1.59) | 2.84                             | (1.84) | 2.06            | (1.94) | 2.88                     | (1.74) |
| Score = 0                            | 1,457                   | 43.0   | 263                              | 3.3    | 13              | 27.7   | 6                        | 3.5    |
| 1                                    | 704                     | 20.8   | 2,043                            | 26.0   | 11              | 23.4   | 34                       | 19.9   |
| 2                                    | 559                     | 16.5   | 1,565                            | 19.9   | 5               | 10.6   | 47                       | 27.5   |
| 3                                    | 326                     | 9.6    | 1,467                            | 18.6   | 5               | 10.6   | 24                       | 14.0   |
| 4                                    | 176                     | 5.2    | 1,118                            | 14.2   | 7               | 14.9   | 30                       | 17.5   |
| ≥ 5                                  | 169                     | 5.0    | 1,414                            | 18.0   | 6               | 12.8   | 30                       | 17.5   |

\* AED = antiepileptic drug; SD = standard deviation

**Online Table 2: Incidence of completed suicide (events per 100,000 person years) according to disease groups and AED use**

| <b>Cohorts</b>                                  | <b>N</b>  | <b>(n)<br/>suicide events</b> | <b>Person- years</b> | <b>Crude IR x<br/>100,000</b> | <b>95% CI</b> |        |
|-------------------------------------------------|-----------|-------------------------------|----------------------|-------------------------------|---------------|--------|
| <b>No epilepsy, depression or BD</b>            |           |                               |                      |                               |               |        |
| <b>No AED (referent group)</b>                  | 4,514,366 | 262                           | 28,189,879           | 0.93                          | 0.82          | 1.05   |
| <b>Any use of AED</b>                           | 77,319    | 7                             | 305,228              | 2.29                          | 0.92          | 4.73   |
| <b>Epilepsy only (no depression or BD)</b>      |           |                               |                      |                               |               |        |
| <b>No AED</b>                                   | 16,120    | 4                             | 86,504               | 4.62                          | 1.26          | 11.84  |
| <b>Any use of AED</b>                           | 39,325    | 3                             | 214,045              | 1.40                          | 0.29          | 4.10   |
| <b>Depression only (no epilepsy or BD)</b>      |           |                               |                      |                               |               |        |
| <b>No AED</b>                                   | 435,790   | 156                           | 2,554,713            | 6.11                          | 5.19          | 7.14   |
| <b>Any use of AED</b>                           | 30,772    | 9                             | 132,298              | 6.80                          | 3.11          | 12.91  |
| <b>Bipolar affective disorder (no epilepsy)</b> |           |                               |                      |                               |               |        |
| <b>No AED</b>                                   | 3,814     | 10                            | 22,675               | 44.10                         | 21.15         | 81.10  |
| <b>Any use of AED</b>                           | 1,809     | 4                             | 9,320                | 42.92                         | 11.69         | 109.89 |
| <b>Epilepsy and depression (no BD)</b>          |           |                               |                      |                               |               |        |
| <b>No AED</b>                                   | 3,392     | 3                             | 16,561               | 18.12                         | 3.74          | 52.94  |
| <b>Any use of AED</b>                           | 7,870     | 5                             | 39,144               | 12.77                         | 4.15          | 29.81  |
| <b>Epilepsy and bipolar affective disorder</b>  |           |                               |                      |                               |               |        |
| <b>No AED</b>                                   | 47        | 0                             | 210                  | 0.00                          | --            | --     |
| <b>Any use of AED</b>                           | 171       | 1                             | 826                  | 121.11                        | 3.07          | 674.76 |
| <b>Total</b>                                    | 5,130,795 | 464                           | 31,571,402           | 1.47                          | 1.34          | 1.61   |

AED = Anti-epileptic drugs; BD = Bipolar affective disorder; IR = Incidence Rate; CI = Confidence Intervals.

**Online Table 3: Incidence of completed suicides during current exposure to AED and prior exposure to AED**

| <b>Suicides</b>                        |              |                 |                                              |                                   |               |        |                 |                                            |                                   |               |         |
|----------------------------------------|--------------|-----------------|----------------------------------------------|-----------------------------------|---------------|--------|-----------------|--------------------------------------------|-----------------------------------|---------------|---------|
| <b>Cohorts</b>                         | <b>N Pts</b> | <b>Suicides</b> | <b>Current<br/>AED<br/>Person-<br/>years</b> | <b>Crude<br/>IR x<br/>100,000</b> | <b>95% CI</b> |        | <b>Suicides</b> | <b>Prior<br/>AED<br/>Person-<br/>years</b> | <b>Crude<br/>IR x<br/>100,000</b> | <b>95% CI</b> |         |
| AED (no epilepsy, depression or BD)    | 77,319       | 2               | 84,753                                       | <b>2.36</b>                       | 0.29          | 8.52   | 5               | 220,475                                    | <b>2.27</b>                       | 0.74          | 5.29    |
| Epilepsy and AED (no depression or BD) | 39,325       | 2               | 163,085                                      | <b>1.23</b>                       | 0.15          | 4.43   | 1               | 50,960                                     | <b>1.96</b>                       | 0.05          | 10.93   |
| AED and depression (no epilepsy or BD) | 30,772       | 2               | 33,300                                       | <b>6.01</b>                       | 0.73          | 21.70  | 7               | 98,997                                     | <b>7.07</b>                       | 2.84          | 14.57   |
| AED and BD (no epilepsy)               | 1,809        | 1               | 4,785                                        | <b>20.90</b>                      | 0.53          | 116.43 | 3               | 4,535                                      | <b>66.15</b>                      | 13.64         | 193.33  |
| Epilepsy, AED and depression (no BD)   | 7,870        | 4               | 28,734                                       | <b>13.92</b>                      | 3.79          | 35.64  | 1               | 10,410                                     | <b>9.61</b>                       | 0.24          | 53.52   |
| Epilepsy, AED and BD                   | 171          | 0               | 605                                          | <b>0.00</b>                       | 0.00          | 609.65 | 1               | 221                                        | <b>453.23</b>                     | 11.47         | 2525.21 |

AED = Anti-epileptic drugs; BD = Bipolar affective disorder; IR = Incidence Rate; CI = Confidence Intervals.

**Online Table 4: Incidence of suicidality during current exposure to AED and prior exposure to AED**

| <b>Suicidality</b>                     |              |                          |                                 |                           |               |        |                          |                                |                           |               |         |
|----------------------------------------|--------------|--------------------------|---------------------------------|---------------------------|---------------|--------|--------------------------|--------------------------------|---------------------------|---------------|---------|
| <b>Cohorts</b>                         | <b>N Pts</b> | <b>Suicide attempts*</b> | <b>Current AED Person-years</b> | <b>Crude IR x 100,000</b> | <b>95% CI</b> |        | <b>Suicide attempts*</b> | <b>Prior -AED Person-years</b> | <b>Crude IR x 100,000</b> | <b>95% CI</b> |         |
| AED (no epilepsy, depression or BD)    | 77,319       | 49                       | 84,656                          | <b>57.88</b>              | 42.82         | 76.52  | 71                       | 220,151                        | <b>32.25</b>              | 25.19         | 40.68   |
| Epilepsy and AED (no depression or BD) | 39,325       | 79                       | 162,795                         | <b>48.53</b>              | 38.42         | 60.48  | 24                       | 50,712                         | <b>47.33</b>              | 30.32         | 70.42   |
| AED and depression (no epilepsy or BD) | 30,772       | 95                       | 33,103                          | <b>286.98</b>             | 232.19        | 350.82 | 137                      | 97,751                         | <b>140.15</b>             | 117.67        | 165.68  |
| AED and BD (no epilepsy)               | 1,809        | 17                       | 4,711                           | <b>360.86</b>             | 210.21        | 577.77 | 23                       | 4,354                          | <b>528.26</b>             | 334.87        | 792.65  |
| Epilepsy, AED and depression (no BD)   | 7,870        | 60                       | 28,466                          | <b>210.78</b>             | 160.84        | 271.31 | 36                       | 9,985                          | <b>360.52</b>             | 252.51        | 499.12  |
| Epilepsy, AED and BD                   | 171          | 1                        | 602                             | <b>165.99</b>             | 4.20          | 924.85 | 1                        | 216                            | <b>462.04</b>             | 11.70         | 2574.34 |

AED = Anti-epileptic drugs; BD = Bipolar affective disorder; IR = Incidence Rate; CI = Confidence Intervals.

\* First event of suicidality

**Online Table 5. Effect of use of AED and other risk factors on suicidality**

| <b>Risk Factors</b>                          | <b>OR</b> | <b>95% CI</b> |      |
|----------------------------------------------|-----------|---------------|------|
| <b>Prior epilepsy</b>                        | 1.52      | 1.23          | 1.88 |
| <b>Prior depression</b>                      | 1.48      | 1.35          | 1.63 |
| <b>Prior BD</b>                              | 2.11      | 1.36          | 3.27 |
| <b>Current Use AED</b>                       | 1.60      | 1.29          | 1.99 |
| <b>Prior Use AED</b>                         | 1.12      | 0.93          | 1.37 |
| <b>Age (per year)</b>                        | 0.97      | 0.96          | 0.98 |
| <b>Years of diagnosis (per year from dx)</b> | 0.98      | 0.97          | 0.99 |
| <b>Prior lithium use</b>                     | 2.48      | 1.76          | 3.49 |
| <b>Prior antipsychotic drug use</b>          | 1.64      | 1.51          | 1.77 |
| <b>Prior antidepressant drug use</b>         | 3.69      | 3.42          | 3.99 |
| <b>Prior alcohol abuse</b>                   | 6.45      | 5.68          | 7.32 |
| <b>Prior history of mental disorder</b>      | 2.75      | 2.54          | 2.98 |
| <b>Chronic Disease Score</b>                 | 1.19      | 1.17          | 1.22 |

AED = antiepileptic drug; BD = bipolar affective disorder; OR = odds ratio; CI = Confidence Interval

OR derived from one conditional logistic regression model adjusted for the variables listed in the table; matched by age (+/- 5years), sex and practice.

### Online Table 6. Effect of use of individual AEDs on suicidality

| <b>Risk Factors</b>       | <b>OR</b>   | <b>95% CI</b> |      |
|---------------------------|-------------|---------------|------|
| Current Use Carbamazepine | <b>1.35</b> | 1.02          | 1.79 |
| Current Use Gabapentin    | <b>0.89</b> | 0.45          | 1.77 |
| Current Use Lamotrigine   | <b>1.07</b> | 0.58          | 1.98 |
| Current Use Levetiracetam | <b>0.70</b> | 0.12          | 4.00 |
| Current Use Pregabalin    | <b>0.24</b> | 0.03          | 2.17 |
| Current Use Topiramate    | <b>0.52</b> | 0.15          | 1.78 |
| Current Use Valproate     | <b>1.44</b> | 0.99          | 2.08 |

AED = antiepileptic drug; OR = odds ratio; CI = Confidence Interval

OR derived from one conditional logistic regression model matched by age (+/- 5years), gender and practice; adjusted for age, duration of disease, current use of oxcarbazepine, tiagabine and zonisamir, prior AED use, prior lithium use, prior antipsychotic use, prior antidepressant use, alcohol abuse, prior history of mental disorder, and chronic disease score.
